# Supplementary material for: The Role of the Environment in Dynamics of Antibiotic Resistance in Humans and Animals: A Modelling Study
Source: MDPI journal article supplement (doi:10.3390/antibiotics11101361), 2022-10-05
Supplement: s1 [file s1]

**Appendix for manuscript: The role of the environment in transmission of antimicrobial resistance between humans and animals**

Table S1: Parameter definitions

| Parameter            | Definition and units                                                                                                                                                   |
|----------------------|------------------------------------------------------------------------------------------------------------------------------------------------------------------------|
| $\beta_{HH}$         | Per capita rate at which humans acquire antibiotic resistant bacteria as a result of exposure to other humans harbouring resistant bacteria per time step              |
| $\beta_{AA}$         | Per capita rate at which animals acquire antibiotic resistant bacteria as a result of exposure to other animals harbouring resistant bacteria per time step            |
| $\beta_{AH}$         | Per capita rate at which humans acquire antibiotic resistant bacteria as a result of exposure to animals harbouring resistant bacteria per time step                   |
| $\beta_{HA}$         | Per capita rate at which animals acquire antibiotic resistant bacteria as a result of exposure to humans harbouring resistant bacteria per time step                   |
| $\beta_{HE}$         | Per environmental unit rate* at which the environment acquires resistant bacteria as a result of exposure to humans harbouring resistant bacteria per time step        |
| $\beta_{EH}$         | Per capita rate at which humans acquire antibiotic resistant bacteria as a result of exposure to environmental units harbouring resistant bacteria per time step       |
| $\beta_{AE}$         | Per environmental unit rate* at which the environment acquires resistant bacteria as a result of exposure to animals harbouring resistant bacteria per time step       |
| $\beta_{EA}$         | Per capita rate at which animals acquire antibiotic resistant bacteria as a result of exposure to environmental units harbouring resistant bacteria per time step      |
| $\Lambda_H$          | Per capita rate at which humans acquire antibiotic resistant bacteria as a result of direct exposure to antibiotics per time step                                      |
| $\Lambda_A$          | Per capita rate at which animals acquire antibiotic resistant bacteria as a result of direct exposure to antibiotics per time step                                     |
| $\gamma_H$           | Proportion of $\Lambda_H$ that reaches the environment as antibiotics (a scalar parameter)                                                                             |
| $\gamma_A$           | Proportion of $\Lambda_A$ that reaches the environment as antibiotics (a scalar parameter)                                                                             |
| $\gamma_H \Lambda_H$ | Per environmental unit rate* at which the environment acquires resistant bacteria as a result of exposure to a proportion of antibiotics given to humans per time step |
| $\mu_H$              | Per capita rate at which humans with resistant bacteria revert to have only sensitive bacteria per time step                                                           |
| $\mu_A$              | Per capita rate at which animals with resistant bacteria revert to have only sensitive bacteria per time step                                                          |
| $\mu_E$              | Per environmental unit rate* at which environmental units harbouring resistant bacteria revert to having only sensitive bacteria per time step                         |

**Appendix for manuscript: The role of the environment in transmission of antimicrobial resistance between humans and animals**

Table S2: Parameter values

*Table S2A: Transmission coefficients*

Unbounded model

| Parameter    | Balanced | Balanced<br>(low $\beta_{HA}$ ) | Environment-<br>driven | Animal-<br>driven | Human-<br>driven |
|--------------|----------|---------------------------------|------------------------|-------------------|------------------|
| $\beta_{HH}$ | 0.074    | 0.074                           | 0.001                  | 0.001             | 0.202            |
| $\beta_{AA}$ | 0.074    | 0.074                           | 0.001                  | 0.202             | 0.001            |
| $\beta_{HA}$ | 0.074    | 0.0007                          | 0.001                  | 0.001             | 0.202            |
| $\beta_{AH}$ | 0.074    | 0.074                           | 0.001                  | 0.202             | 0.001            |
| $\beta_{EH}$ | 0.074    | 0.074                           | 0.142                  | 0.001             | 0.001            |
| $\beta_{EA}$ | 0.074    | 0.074                           | 0.142                  | 0.001             | 0.001            |
| $\beta_{HE}$ | 0.074    | 0.074                           | 0.142                  | 0.001             | 0.202            |
| $\beta_{AE}$ | 0.074    | 0.074                           | 0.142                  | 0.202             | 0.001            |

Bounded model

| Parameter    | Balanced | Balanced<br>(low $\beta_{HA}$ ) | Environment-<br>driven | Animal-<br>driven | Human-<br>driven |
|--------------|----------|---------------------------------|------------------------|-------------------|------------------|
| $\beta_{HH}$ | 0.081    | 0.081                           | 0.001                  | 0.001             | 0.202            |
| $\beta_{AA}$ | 0.081    | 0.081                           | 0.001                  | 0.202             | 0.001            |
| $\beta_{HA}$ | 0.081    | 0.0008                          | 0.001                  | 0.001             | 0.202            |
| $\beta_{AH}$ | 0.081    | 0.081                           | 0.001                  | 0.202             | 0.001            |
| $\beta_{EH}$ | 0.081    | 0.081                           | 0.231                  | 0.001             | 0.001            |
| $\beta_{EA}$ | 0.081    | 0.081                           | 0.231                  | 0.001             | 0.001            |
| $\beta_{HE}$ | 0.081    | 0.081                           | 0.231                  | 0.001             | 0.202            |
| $\beta_{AE}$ | 0.081    | 0.081                           | 0.231                  | 0.202             | 0.001            |

*Table S2B: Other parameters*

| Parameter   | Value    |                                                               |
|-------------|----------|---------------------------------------------------------------|
|             | Fig 1. B | Fig 2. And 3.                                                 |
| $\Lambda_H$ | 0.1      | Beta(1.7, 15.3) (mean 0.1)                                    |
| $\Lambda_A$ | 0.1      | No intervention: 0.1 or U(0.000001,1.);<br>intervention: 0.0. |
| $\gamma_H$  | 0.001    | 0.001                                                         |
| $\gamma_A$  | 0.001    | 0.001                                                         |
| $\mu_H$     | 0.1      | Beta(1.7, 15.3) (mean 0.1)                                    |
| $\mu_A$     | 0.1      | 0.1                                                           |
| $\mu_E$     | 0.2      | Beta(3, 12) (mean 0.2)                                        |

## Additional methods information

### Methods for finding transmission parameter coefficients

Transmission parameters were chosen by the following method: some parameters were fixed ( $p_f$ ) whilst the transmission parameters of interest varied ( $p_v$ ) to reach a human resistance level of 54.1% (rate of ampicillin resistance in clinical isolates of *E. coli* in the EU in 2020, based on EARS-Net data<sup>1</sup>):

$$\min_{p_v \in (0,1)} |0.71 - f(p_v, p_f)|$$

For example, for the human-driven transmission scenario, rates of transfer of resistance from humans to any other population were varied ( $\beta_{HH} = \beta_{HA} = \beta_{HE}$ ), and all other transmission parameter values were fixed at a low value, 0.001.

### Model timesteps

To ensure equilibrium values were obtained for all experiments, we initially numerically solved the model to 500 timesteps, and if there was a difference of more than 0.0000001 between the  $R_H$  values for the final two timesteps, we solved to 10,000 timesteps.

**Appendix for manuscript: The role of the environment in transmission of antimicrobial resistance between humans and animals**

**Figure S1:** Trajectory plot of the fraction of human and animal populations carrying resistant bacteria ( $R_H$ ,  $R_A$ ), and the amount of resistant material in the environment ( $R_E$ ). For bounded environment model (left) and unbounded (right). Uses the balanced transmission scenario.

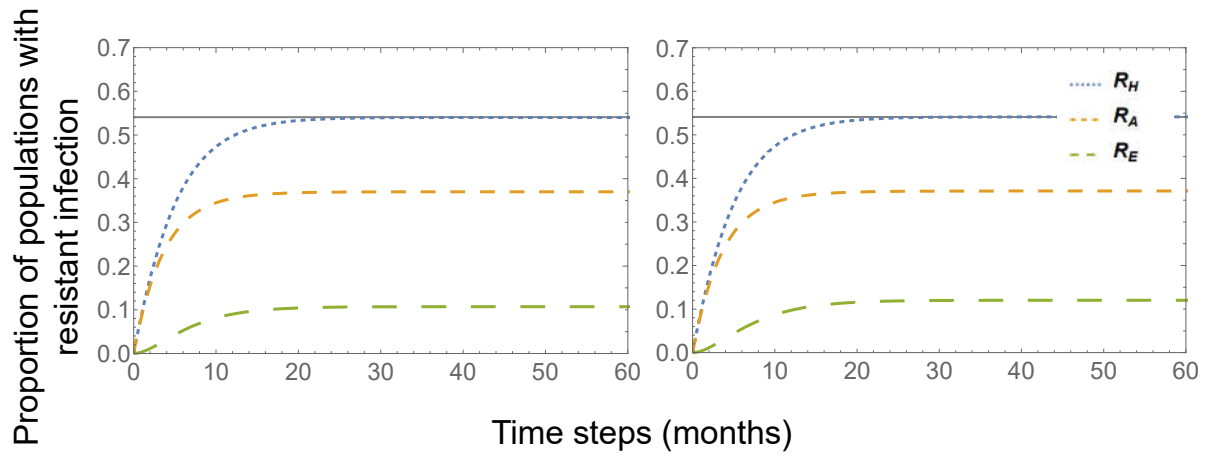

## Appendix for manuscript: The role of the environment in transmission of antimicrobial resistance between humans and animals

**Figure S2:** Heatmaps of the impact of reducing  $\Lambda_A$ , for different pre-intervention levels of  $\Lambda_A$  (Y axis) and  $\beta_{EH}$  (X axis), in all transmission scenarios. Plot A) uses the bounded, and plot B) uses the unbounded versions of the model.

A

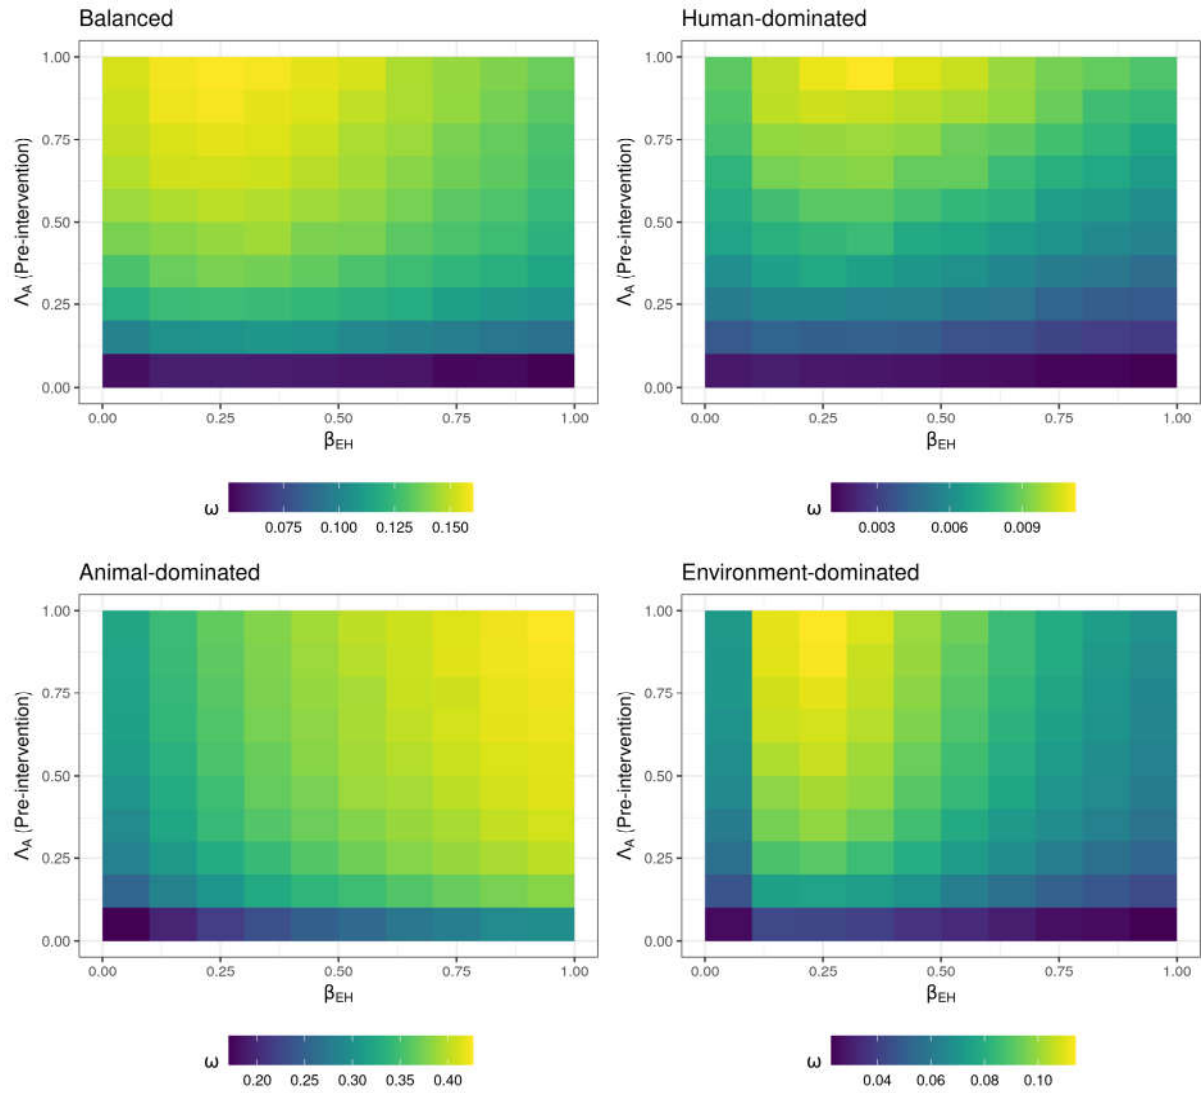

## Appendix for manuscript: The role of the environment in transmission of antimicrobial resistance between humans and animals

B

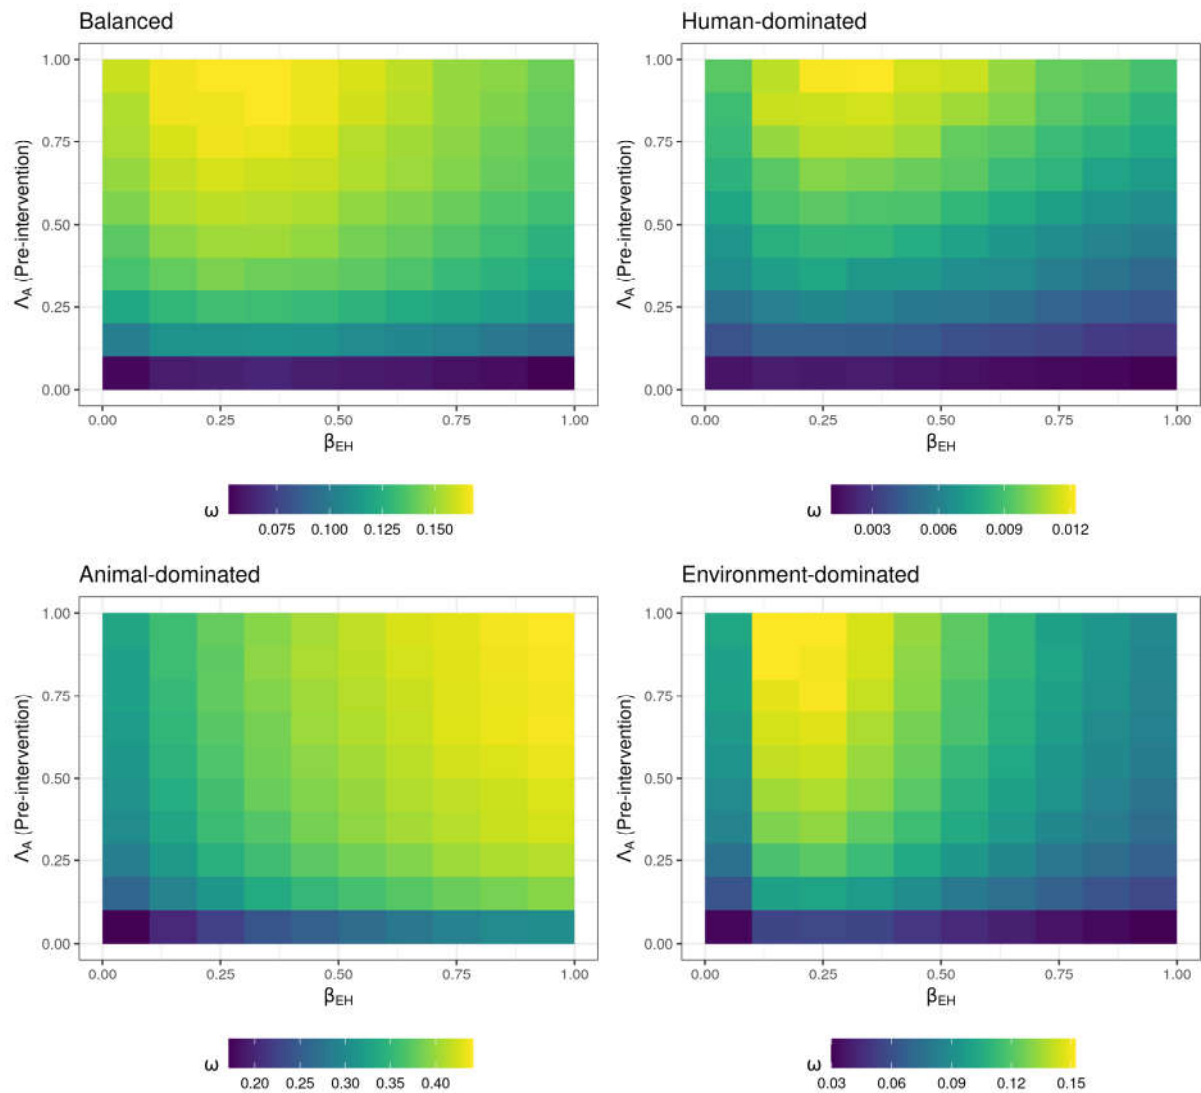

## Appendix references

1. WHO Regional Office for Europe/European Centre for Disease Prevention and Control. *Antimicrobial Resistance Surveillance in Europe 2022 - 2020 Data*. WHO Regional Office for Europe; 2022.
